# Supplementary material
Source: PubMed Central journal article supplement (PMC9871326)
Supplement: mmc1.pdf [file mmc1.pdf]

**Table S1.** Tag sequences for strand-specific RT-qPCR, Related to Step 108

| <b>Tag</b>        | <b>Sequences (5'-3')</b> |
|-------------------|--------------------------|
| R1 (SP6 promoter) | ATTTAGGTGACACTATAG       |
| R2 (CMV promoter) | CGCAAATGGGCGGTAGGCGTG    |
| R3 (GST)          | GGGCTGGCAAGCCACGTTTGG    |

**Table S2.** Primer sequences for strand-specific reverse transcription, Related to Step 108

| <b>Primer</b> | <b>Sequences (5'-3')</b>    |
|---------------|-----------------------------|
| ND1 Heavy     | Tag-GTTGTGATAAGGGTGGAGAGG   |
| ND1 Light     | Tag-TCAAACCTCAAACCTACGCCCTG |
| ND4 Heavy     | Tag-TGTTTGTCTAGGCAGATGG     |
| ND4 Light     | Tag-CCTCACACTCATTCTCAACCC   |
| ND5 Heavy     | Tag-TTTGGGTTGAGGTGATGATG    |
| ND5 Light     | Tag-CATTGTGCATCCACCTTTA     |
| ND6 Heavy     | Tag-GGTTGAGGTCTTGGTGAGTG    |
| ND6 Light     | Tag-CCCATAATCATACAAAGCCCC   |
| CYTB Heavy    | Tag-GGATAGTAATAGGGCAAGGACG  |
| CYTB Light    | Tag-CAATTATACCCTAGCCAACCCC  |
| CO1 Heavy     | Tag-TTGAGGTTGCGGTCTGTTAG    |
| CO1 Light     | Tag-GCCATAACCCAATACCAAACG   |
| CO2 Heavy     | Tag-GTAAAGGATGCGTAGGGATGG   |
| CO2 Light     | Tag-CTAGTCCTGTATGCCCTTTTCC  |
| CO3 Heavy     | Tag-CTCCTGATGCGAGTAATACGG   |
| CO3 Light     | Tag-CCTTTTACCACTCCAGCCTAG   |
| ACTB          | Tag-ACACAGAGTACTTGCGCTCAG   |
| GAPDH         | Tag-TGAGCGATGTGGCTCGGCT     |

**Table S3.** Primer sequences for strand-specific qPCR, Related to Step 113

| <b>Gene</b> | <b>Forward Primer (5'-3')</b> | <b>Reverse Primer (5'-3')</b> |
|-------------|-------------------------------|-------------------------------|
| ND1 Heavy   | TCAAACCTCAAACCTACGCCCTG       | Tag                           |
| ND1 Light   | GTTGTGATAAGGGTGGAGAGG         | Tag                           |
| ND4 Heavy   | CTCACACTCATTCTCAACCCC         | Tag                           |
| ND4 Light   | TGTTTGTCGTAGGCAGATGG          | Tag                           |
| ND5 Heavy   | CTAGGCCTTCTTACGAGCC           | Tag                           |
| ND5 Light   | TAGGGAGAGCTGGGTTGTTT          | Tag                           |
| ND6 Heavy   | TCATACTCTTTCACCCACAGC         | Tag                           |
| ND6 Light   | TGCTGTGGGTGAAAGAGTATG         | Tag                           |
| CYTB Heavy  | CAATTATACCCTAGCCAACCCC        | Tag                           |
| CYTB Light  | GGATAGTAATAGGGCAAGGACG        | Tag                           |
| CO1 Heavy   | GCCATAACCCAATACCAAACG         | Tag                           |
| CO1 Light   | TTGAGGTTGCGGTCTGTTAG          | Tag                           |
| CO2 Heavy   | CTAGTCCTGTATGCCCTTTTCC        | Tag                           |
| CO2 Light   | GTAAGGATGCGTAGGGATGG          | Tag                           |
| CO3 Heavy   | CCTTTTACCACTCCAGCCTAG         | Tag                           |
| CO3 Light   | CTCCTGATGCGAGTAATACGG         | Tag                           |
| ACTB        | ACACAGTGCTGTCTCGTGGTA         | Tag                           |
| GAPDH       | CAACGACCACTTTGTCAAGC          | Tag                           |
